# Supplementary material for: Synergistic Malaria Parasite Killing by Two Types of Plasmodial Surface Anion Channel Inhibitors
Source: PLOS journal article supplement (doi:10.1371/journal.pone.0149214), 2016-02-11
Supplement: S2 (10.1371/journal.pone.0149214.s002) [file journal.pone.0149214.s002]

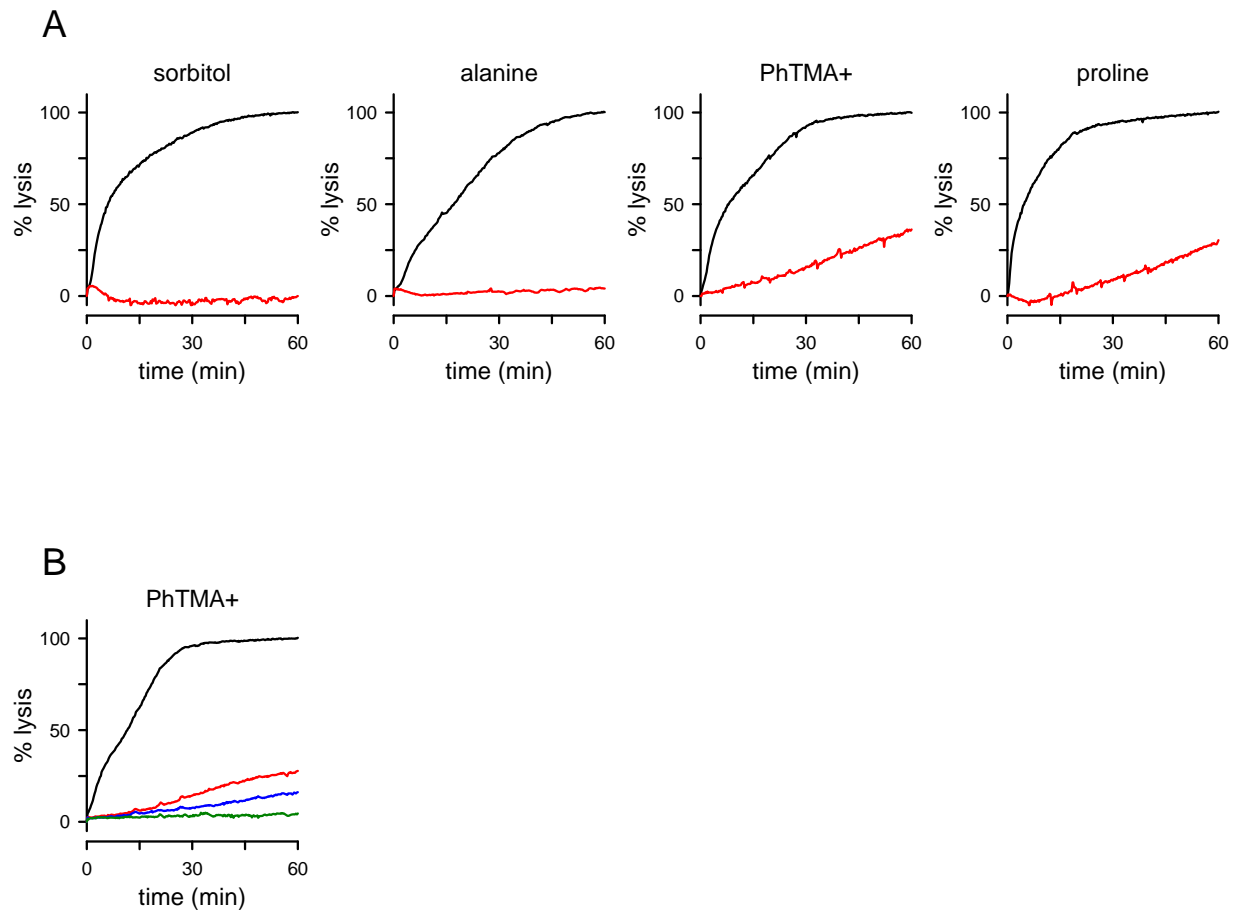

**S2 Fig. Similar transport of solutes and residual inhibitor action in rhesus erythrocytes infected with *P. knowlesi*.** (A) Osmotic lysis kinetics for *P. knowlesi*-induced channels in indicated solutes without and with 200  $\mu$ M furosemide (black and red traces, respectively). (B) Inhibition of the residual transport in *P. knowlesi*-infected cells by 3  $\mu$ M PRT-1 or 3  $\mu$ M PRT-3 (blue and green traces, respectively; other traces as in panel A).
